# Supplementary material
Source: publisher figshare collection journal article supplement (https://tandf.figshare.com/articles/dataset/_/7393130)
Supplement: Supplementary file 1 [file 1]

# Supplementary Materials for “MM Algorithms for Variance Components Models”

Liuyi Hu      Hua Zhou      Jin Zhou      Kenneth Lange

## S.1 Proof for Lemma 2

*Proof.* Let  $\mathbf{X} = (X_1, \dots, X_n)^T$  be a random normal vector with mean  $\mathbf{0}$  and positive definite covariance matrix  $\mathbf{A}$ . Let  $\mathbf{Y} = (Y_1, \dots, Y_n)^T$  be a random normal vector independent of  $\mathbf{X}$  with mean  $\mathbf{0}$  and positive semidefinite covariance matrix  $\mathbf{B}$  having positive diagonal entries. Then  $\mathbf{Z} = \mathbf{X} \odot \mathbf{Y}$  has covariances  $E(Z_i Z_j) = E(X_i Y_i X_j Y_j) = E(X_i X_j) E(Y_i Y_j) = a_{ij} b_{ij}$ . It follows that  $\text{Cov}(\mathbf{Z}) = \mathbf{A} \odot \mathbf{B}$ . To show  $\mathbf{A} \odot \mathbf{B}$  is positive definite, suppose on the contrary that  $\mathbf{v}^T (\mathbf{A} \odot \mathbf{B}) \mathbf{v} = \text{Var}(\mathbf{v}^T \mathbf{Z}) = 0$  for some  $\mathbf{v} \neq \mathbf{0}$ . Then

$$0 = \text{Var}(\mathbf{v}^T \mathbf{Z}) = E\left(\sum_i v_i X_i Y_i\right)^2 = E\left[\left(\sum_i v_i X_i Y_i\right)^2 \mid \mathbf{Y}\right] = E[(\mathbf{v} \odot \mathbf{Y})^T \mathbf{A} (\mathbf{v} \odot \mathbf{Y})]$$

implies  $\mathbf{v} \odot \mathbf{Y} = \mathbf{0}$  with probability 1. Since  $\mathbf{v} \neq \mathbf{0}$ ,  $Y_i = 0$  with probability 1 for some  $i$ . This contradicts the assumption  $b_{ii} = \text{Var}(Y_i) > 0$  for all  $i$ .  $\square$

## S.2 Objective Values in ANOVA Simulation Example

Table 1 summarizes the converged objective values for the two-way ANOVA example in Section 3. Reported in table are average and standard error based on 50 simulation replicates.

## S.3 Proof of Theorem 1

We need three technical Lemmas to show the global convergence result in Theorem 1.

**Lemma S.1.** *Under Assumption 1 or 2, the log-likelihood function (1) is coercive in the sense that the super-level set  $S_c = \{\boldsymbol{\sigma}^2 \geq \mathbf{0} : L(\boldsymbol{\sigma}^2) \geq c\}$  is compact for every  $c$ .*

*Proof.* Let us first prove the assertion when all of the covariance matrices  $\mathbf{V}_i$  are positive definite. If we set  $r = \|\boldsymbol{\sigma}^2\|_1$  and  $\alpha_i = r^{-1} \sigma_i^2$  for each  $i$ , then the log-likelihood satisfies

$$L(\boldsymbol{\sigma}^2) = -\frac{n}{2} \ln r - \frac{1}{2} \ln \det \left( \sum_{i=1}^m \alpha_i \mathbf{V}_i \right) - \frac{1}{2r} \mathbf{y}^T \left( \sum_{i=1}^m \alpha_i \mathbf{V}_i \right)^{-1} \mathbf{y}.$$

The functions  $\ln \det \left( \sum_{i=1}^m \alpha_i \mathbf{V}_i \right)$  and  $\mathbf{y}^T \left( \sum_{i=1}^m \alpha_i \mathbf{V}_i \right)^{-1} \mathbf{y}$  of  $\boldsymbol{\alpha}$  are defined and continuous on the unit simplex and hence bounded there. The dominant term  $-\frac{n}{2} \ln r$  of the loglikelihood tends to  $-\infty$  as  $r$  tends to  $\infty$ .

Table 1: MM, EM, Fisher scoring, and lme4 converge to similar objective values. Shown below are average objective values for fitting a two-way ANOVA model with  $a = b = 5$  levels of both factors. Standard errors are given in parentheses.

| $\sigma_1^2/\sigma_e^2$ | Method | $c = \#$ observations per combination |                |                |                 |
|-------------------------|--------|---------------------------------------|----------------|----------------|-----------------|
|                         |        | 5                                     | 10             | 20             | 50              |
| 0.00                    | MM     | -176.67(7.94)                         | -353.59(10.19) | -713.42(14.90) | -1776.40(25.02) |
|                         | EM     | -176.68(7.94)                         | -353.60(10.18) | -713.43(14.90) | -1776.41(25.02) |
|                         | FS     | -176.67(7.94)                         | -353.59(10.19) | -713.42(14.90) | -1776.40(25.02) |
|                         | lme4   | -176.67(7.94)                         | -353.59(10.19) | -713.42(14.90) | -1776.40(25.02) |
| 0.05                    | MM     | -181.06(7.24)                         | -365.39(10.92) | -722.16(15.36) | -1794.26(25.96) |
|                         | EM     | -181.06(7.24)                         | -365.39(10.92) | -722.16(15.36) | -1794.26(25.96) |
|                         | FS     | -181.06(7.24)                         | -365.39(10.92) | -722.16(15.36) | -1794.26(25.96) |
|                         | lme4   | -181.06(7.24)                         | -365.39(10.92) | -722.16(15.36) | -1794.26(25.96) |
| 0.10                    | MM     | -185.10(6.77)                         | -368.83(10.28) | -726.21(13.35) | -1813.88(20.24) |
|                         | EM     | -185.10(6.77)                         | -368.83(10.28) | -726.21(13.35) | -1813.88(20.24) |
|                         | FS     | -185.10(6.77)                         | -368.83(10.28) | -726.21(13.35) | -1813.88(20.24) |
|                         | lme4   | -185.10(6.77)                         | -368.83(10.28) | -726.21(13.35) | -1813.88(20.24) |
| 1.00                    | MM     | -204.05(8.18)                         | -392.35(10.94) | -754.95(13.93) | -1831.11(22.63) |
|                         | EM     | -204.05(8.18)                         | -392.35(10.94) | -754.95(13.93) | -1831.12(22.63) |
|                         | FS     | -204.05(8.18)                         | -392.35(10.94) | -754.95(13.93) | -1831.11(22.63) |
|                         | lme4   | -204.05(8.18)                         | -392.35(10.94) | -754.95(13.93) | -1831.11(22.63) |
| 10.00                   | MM     | -233.65(7.90)                         | -416.56(11.79) | -777.85(15.65) | -1862.05(28.29) |
|                         | EM     | -233.65(7.90)                         | -416.56(11.79) | -777.85(15.65) | -1862.05(28.29) |
|                         | FS     | -233.65(7.90)                         | -416.56(11.79) | -777.85(15.65) | -1862.05(28.29) |
|                         | lme4   | -233.65(7.90)                         | -416.56(11.79) | -777.85(15.65) | -1862.05(28.29) |
| 20.00                   | MM     | -242.21(8.20)                         | -424.68(10.11) | -795.63(15.56) | -1864.07(24.56) |
|                         | EM     | -242.21(8.20)                         | -424.68(10.11) | -795.63(15.56) | -1864.07(24.56) |
|                         | FS     | -242.21(8.20)                         | -424.68(10.11) | -795.63(15.56) | -1864.07(24.56) |
|                         | lme4   | -242.21(8.20)                         | -424.68(10.11) | -795.63(15.56) | -1864.07(24.56) |

To prove the assertion under Assumption 2, consider first the case  $\mathbf{V}_1 = \mathbf{I}_n$ . Setting  $\alpha_i = \sigma_i^2/\sigma_1^2$  for  $i = 2, \dots, m$  reduces the loglikelihood to

$$L(\sigma_1^2, \boldsymbol{\alpha}) = -\frac{n}{2} \ln \sigma_1^2 - \frac{1}{2} \ln \det \left( \mathbf{I}_n + \sum_{i=2}^m \alpha_i \mathbf{V}_i \right) - \frac{1}{2\sigma_1^2} \mathbf{y}^T \left( \mathbf{I}_n + \sum_{i=2}^m \alpha_i \mathbf{V}_i \right)^{-1} \mathbf{y}. \quad (1)$$

The middle term on the right satisfies

$$-\frac{1}{2} \ln \det \left( \mathbf{I}_n + \sum_{i=2}^m \alpha_i \mathbf{V}_i \right) \leq 0$$

because  $\det \left( \mathbf{I}_n + \sum_{i=2}^m \alpha_i \mathbf{V}_i \right) \geq \det \mathbf{I}_n = 1$ . Now let  $\mathbf{U} = (\mathbf{U}_q, \mathbf{U}_{n-q})$  be an  $n \times n$  orthogonal matrix whose left columns  $\mathbf{U}_q$  span  $\mathcal{H}$  and whose right columns  $\mathbf{U}_{n-q}$  span  $\mathcal{H}^\perp$ . The identity

$$\mathbf{U}^T \left( \mathbf{I}_n + \sum_{i=2}^m \alpha_i \mathbf{V}_i \right) \mathbf{U} = \begin{pmatrix} \mathbf{I}_q + \sum_{i=2}^m \alpha_i \mathbf{U}_q^T \mathbf{V}_i \mathbf{U}_q & \mathbf{0} \\ \mathbf{0} & \mathbf{I}_{n-q} \end{pmatrix}$$

follows from the orthogonality relations  $\mathbf{U}_{n-q}^T \mathbf{V}_i = \mathbf{U}_{n-q}^T \mathbf{U}_q = \mathbf{0}_{(n-q) \times n}$ . This in turn implies

$$\begin{aligned} \left( \mathbf{I}_n + \sum_{i=2}^m \alpha_i \mathbf{V}_i \right)^{-1} &= \mathbf{U} \begin{pmatrix} (\mathbf{I}_q + \sum_{i=2}^m \alpha_i \mathbf{U}_q^T \mathbf{V}_i \mathbf{U}_q)^{-1} & \mathbf{0} \\ \mathbf{0} & \mathbf{I}_{n-q} \end{pmatrix} \mathbf{U}^T \\ &\succeq \mathbf{U} \begin{pmatrix} \mathbf{0} & \mathbf{0} \\ \mathbf{0} & \mathbf{I}_{n-q} \end{pmatrix} \mathbf{U}^T \\ &= \mathbf{U}_{n-q} \mathbf{U}_{n-q}^T. \end{aligned}$$

Therefore the quadratic term in equation (1) is bounded below by the positive constant

$$\mathbf{y}^T \left( \mathbf{I}_n + \sum_{i=2}^m \alpha_i \mathbf{V}_i \right)^{-1} \mathbf{y} \geq \mathbf{y}^T \mathbf{U}_{n-q} \mathbf{U}_{n-q}^T \mathbf{y} = \|\mathbb{P}_{\mathcal{H}^\perp} \mathbf{y}\|^2 > 0.$$

Here the assumption  $\mathbf{y} \notin \mathcal{H}$  guarantees the projection property  $\mathbb{P}_{\mathcal{H}^\perp} \mathbf{y} \neq \mathbf{0}$ .

Next we show that the loglikelihood tends to  $-\infty$  when  $\sigma_1^2$  tends to 0 or  $\infty$  or when  $\|\boldsymbol{\alpha}\|_2$  tends to  $\infty$ . The second of the two inequalities

$$\begin{aligned} L(\sigma_0^2, \boldsymbol{\alpha}) &\leq -\frac{n}{2} \ln \sigma_1^2 - \frac{1}{2} \ln \det \left( \mathbf{I}_n + \sum_{i=2}^m \alpha_i \mathbf{V}_i \right) - \frac{1}{2\sigma_1^2} \|\mathbb{P}_{\mathcal{H}^\perp} \mathbf{y}\|^2 \\ &\leq -\frac{n}{2} \ln \sigma_1^2 - \frac{1}{2\sigma_1^2} \|\mathbb{P}_{\mathcal{H}^\perp} \mathbf{y}\|^2 \end{aligned}$$

renders the claim about  $\sigma_1^2$  obvious. To prove the claim about  $\boldsymbol{\alpha}$ , we make the worst case choice  $\sigma_i^2 = \|\mathbb{P}_{\mathcal{H}^\perp} \mathbf{y}\|^2$  in the first inequality. It follows that

$$L(\sigma_0^2, \boldsymbol{\alpha}) \leq -\frac{1}{2} \ln \det \left( \mathbf{I}_n + \sum_{i=2}^m \alpha_i \mathbf{V}_i \right) - \frac{n}{2} \ln \|\mathbb{P}_{\mathcal{H}^\perp} \mathbf{y}\|^2 - \frac{n}{2}.$$

If  $\alpha_j$  tends to  $\infty$ , then the inequality

$$-\frac{1}{2} \ln \det \left( \mathbf{I}_n + \sum_{i=2}^m \alpha_i \mathbf{V}_i \right) \leq -\frac{1}{2} \ln \det \left( \mathbf{I}_n + \alpha_j \mathbf{V}_j \right) = -\frac{1}{2} \sum_{k=1}^n \ln(1 + \alpha_j \lambda_{jk})$$

holds, where the  $\lambda_{jk}$  are the eigenvalues of  $\mathbf{V}_j$ . At least one of these eigenvalues is positive because  $\mathbf{V}_j$  is nontrivial. It follows that  $L(\sigma_0^2, \boldsymbol{\alpha})$  tends to  $-\infty$  in this case as well.

For the general case where  $\mathbf{V}_1$  is non-singular but not necessarily  $\mathbf{I}_n$ , let  $\mathbf{V}_1^{1/2}$  be the symmetric square root of  $\mathbf{V}_1$  and write

$$\mathbf{V}_1 + \sum_{i=2}^m \sigma_i^2 \mathbf{V}_i = \mathbf{V}_1^{1/2} \left( \mathbf{I} + \sum_{i=2}^m \sigma_i^2 \mathbf{V}_1^{-1/2} \mathbf{V}_i \mathbf{V}_1^{-1/2} \right) \mathbf{V}_1^{1/2}.$$

The above arguments still apply since each  $\mathbf{V}_1^{-1/2} \mathbf{V}_i \mathbf{V}_1^{-1/2}$  is nontrivial and  $\mathbf{y}$  belongs to the  $\text{span}\{\mathbf{V}_2, \dots, \mathbf{V}_m\} = \mathcal{S}$  if and only if  $\mathbf{V}_1^{-1/2} \mathbf{y}$  belongs to  $\mathbf{V}_1^{-1/2} \mathcal{S} \mathbf{V}_1^{-1/2}$ .  $\square$

**Lemma S.2.** *The iterates possess the ascent property  $L(M(\boldsymbol{\sigma}^{2(t)})) \geq L(\boldsymbol{\sigma}^{2(t)})$ . Furthermore, when  $L(M(\boldsymbol{\sigma}_*^2)) = L(\boldsymbol{\sigma}_*^2)$ ,  $\boldsymbol{\sigma}_*^2$  fulfills the fixed point condition  $M(\boldsymbol{\sigma}_*^2) = \boldsymbol{\sigma}_*^2$ , and each component satisfies either (i)  $\sigma_{*i}^2 = 0$  or (ii)  $\sigma_{*i}^2 > 0$  and  $\frac{\partial}{\partial \sigma_i^2} L(\boldsymbol{\sigma}_*^2) = 0$ .*

*Proof.* The ascent property is built into any MM algorithm. Suppose  $L(M(\boldsymbol{\sigma}_*^2)) = L(\boldsymbol{\sigma}_*^2)$  at a point  $\boldsymbol{\sigma}_*^2 \in \mathbb{R}_+^m$ . Then equality must hold in the string of inequalities (3). It follows that

$$g(M(\boldsymbol{\sigma}_*^2) \mid \boldsymbol{\sigma}_*^2) = g(\boldsymbol{\sigma}_*^2 \mid \boldsymbol{\sigma}_*^2).$$

$g(\cdot \mid \boldsymbol{\sigma}_*^2)$  has a unique maximum since its Hessian is diagonal with strictly negative entries, hence  $M(\boldsymbol{\sigma}_*^2) = \boldsymbol{\sigma}_*^2$ . If  $\sigma_{*i}^2 > 0$ , the stationarity condition

$$\frac{\partial}{\partial \sigma_i^2} L(\boldsymbol{\sigma}_*^2) = \frac{\partial}{\partial \sigma_i^2} g(\boldsymbol{\sigma}_*^2 \mid \boldsymbol{\sigma}_*^2) = 0$$

applies. The equivalence of the two displayed partial derivatives is a consequence of the fact that the difference  $f(\boldsymbol{\sigma}^2) - g(\boldsymbol{\sigma}^2 \mid \boldsymbol{\sigma}_*^2)$  achieves its minimum of 0 at  $\boldsymbol{\sigma}^2 = \boldsymbol{\sigma}_*^2$ .  $\square$

**Lemma S.3.** *The distance between successive iterates  $\|\boldsymbol{\sigma}^{2(t+1)} - \boldsymbol{\sigma}^{2(t)}\|_2$  converges to 0.*

*Proof.* Suppose on the contrary that  $\|\boldsymbol{\sigma}^{2(t+1)} - \boldsymbol{\sigma}^{2(t)}\|_2$  does not converge to 0. Then one can extract a subsequence  $\{t_k\}_{k \geq 1}$  such that

$$\|\boldsymbol{\sigma}^{2(t_k+1)} - \boldsymbol{\sigma}^{2(t_k)}\|_2 \geq \epsilon > 0 \quad (2)$$

for all  $k$ . Let  $C_0$  be the compact super-level set  $\{\boldsymbol{\sigma}^2 : L(\boldsymbol{\sigma}^2) \geq L(\boldsymbol{\sigma}^{2(0)})\}$ . Since the sequence  $\{\boldsymbol{\sigma}^{2(t_k)}\}_{k \geq 1}$  is confined to  $C_0$ , one can pass to a subsequence if necessary and assume that  $\boldsymbol{\sigma}^{2(t_k)}$  converges to a limit  $\boldsymbol{\sigma}_*^2$  and that  $\boldsymbol{\sigma}^{2(t_k+1)}$  converges to a limit  $\boldsymbol{\sigma}_{**}^2$ . Taking limits in the relation  $\boldsymbol{\sigma}^{2(t_k+1)} = M(\boldsymbol{\sigma}^{2(t_k)})$  and invoking the continuity  $M(\boldsymbol{\sigma}^2)$  imply that  $\boldsymbol{\sigma}_{**}^2 = M(\boldsymbol{\sigma}_*^2)$ . Because the sequence  $L(\boldsymbol{\sigma}^{2(t_k)})$  is monotonically increasing in  $k$  and bounded above on  $C_0$ , it converges to a limit  $L_*$ . Hence, the continuity of  $L(\boldsymbol{\sigma}^2)$  implies

$$L(\boldsymbol{\sigma}_*^2) = \lim_k L(\boldsymbol{\sigma}^{2(t_k)}) = L_* = \lim_k L(\boldsymbol{\sigma}^{2(t_k+1)}) = L(\boldsymbol{\sigma}_{**}^2) = L(M(\boldsymbol{\sigma}_*^2)).$$

Lemma S.2 therefore gives  $\boldsymbol{\sigma}_{**}^2 = M(\boldsymbol{\sigma}_*^2) = \boldsymbol{\sigma}_*^2$ , contradicting the bound  $\|\boldsymbol{\sigma}_*^2 - \boldsymbol{\sigma}_{**}^2\|_2 \geq \epsilon$  entailed by inequality (2).  $\square$

With Lemmas S.1-S.3, we are ready to prove Theorem 1.

*Proof.* The sequence  $\{\boldsymbol{\sigma}^{2(t)}\}_{t \geq 0}$  is contained in the super-level compact set  $C_0$  defined in Lemma S.3 and therefore admits a convergent subsequence  $\boldsymbol{\sigma}^{2(t_k)}$  with limit  $\boldsymbol{\sigma}^{2(\infty)}$ . As argued in Lemma S.3,  $L(\boldsymbol{\sigma}^{2(\infty)}) = L(M(\boldsymbol{\sigma}^{2(\infty)}))$ . Lemma S.2 now implies that  $\boldsymbol{\sigma}^{2(\infty)}$  is a fixed point of the algorithm map  $M(\boldsymbol{\sigma}^2)$ .

According to Ostrowski's theorem (Lange, 2010, Proposition 8.2.1), the set of limit points of a bounded sequence  $\{\boldsymbol{\sigma}^{2(t)}\}_{t \geq 0}$  is connected and compact provided  $\|\boldsymbol{\sigma}^{2(t+1)} - \boldsymbol{\sigma}^{2(t)}\|_2 \rightarrow 0$ . If the set of fixed points is discrete, then the connected subset of limit points reduces to a single point. Hence, the bounded sequence  $\boldsymbol{\sigma}^{2(t)}$  converges to this point. When the limit exists, one can check that  $\boldsymbol{\sigma}^{2(\infty)}$  satisfies the KKT conditions by proving that each zero component of  $\boldsymbol{\sigma}^{2(\infty)}$  has a non-positive partial derivative. Suppose on the contrary  $\sigma_i^{2(\infty)} = 0$  and  $\frac{\partial}{\partial \sigma_i^2} L(\boldsymbol{\sigma}^{2(\infty)}) > 0$ . By continuity  $\frac{\partial}{\partial \sigma_i^2} L(\boldsymbol{\sigma}^{2(t)}) > 0$  for all large  $t$ . Therefore,  $\sigma_i^{2(t+1)} > \sigma_i^{2(t)}$  for all large  $t$  by the observation made after equation (9). This behavior is inconsistent with the assumption that  $\sigma_i^{2(t)} \rightarrow 0$ .  $\square$

## S.4 Proof of Theorem 2

**MM algorithm:** The minorizing function for the MM algorithm is

$$\begin{aligned}
& g_{\text{MM}}(\boldsymbol{\sigma}^2 | \boldsymbol{\sigma}^{2(t)}) \\
&= -\frac{1}{2} \text{tr}(\boldsymbol{\Omega}^{-(t)} \boldsymbol{\Omega}) - \frac{1}{2} (\mathbf{y} - \mathbf{X}\boldsymbol{\beta}^{(t)})^T \boldsymbol{\Omega}^{-(t)} \left( \sum_{i=1}^m \frac{\sigma_i^{4(t)}}{\sigma_i^2} \mathbf{V}_i \right) \boldsymbol{\Omega}^{-(t)} (\mathbf{y} - \mathbf{X}\boldsymbol{\beta}^{(t)}) + c^{(t)} \\
&= \sum_{i=1}^m -\frac{\sigma_i^2}{2} \text{tr}(\boldsymbol{\Omega}^{-(t)} \mathbf{V}_i) - \frac{\sigma_i^{4(t)}}{2\sigma_i^2} (\mathbf{y} - \mathbf{X}\boldsymbol{\beta}^{(t)})^T \boldsymbol{\Omega}^{-(t)} \mathbf{V}_i \boldsymbol{\Omega}^{-(t)} (\mathbf{y} - \mathbf{X}\boldsymbol{\beta}^{(t)}) + c^{(t)},
\end{aligned}$$

where

$$c^{(t)} = -\frac{n}{2} \ln 2\pi - \frac{1}{2} \ln \det \boldsymbol{\Omega}^{(t)} + \frac{n}{2}.$$

Taking derivatives, we have

$$\begin{aligned}
\frac{\partial}{\partial \sigma_i^2} g_{\text{MM}}(\boldsymbol{\sigma}^2 | \boldsymbol{\sigma}^{2(t)}) &= -\frac{1}{2} \text{tr}(\boldsymbol{\Omega}^{-(t)} \mathbf{V}_i) + \frac{\sigma_i^{4(t)}}{2\sigma_i^4} (\mathbf{y} - \mathbf{X}\boldsymbol{\beta}^{(t)})^T \boldsymbol{\Omega}^{-(t)} \mathbf{V}_i \boldsymbol{\Omega}^{-(t)} (\mathbf{y} - \mathbf{X}\boldsymbol{\beta}^{(t)}), \\
\frac{\partial^2}{\partial \sigma_i^2 \partial \sigma_j^2} g_{\text{MM}}(\boldsymbol{\sigma}^2 | \boldsymbol{\sigma}^{2(t)}) &= \begin{cases} -\frac{\sigma_i^{4(t)}}{\sigma_i^6} (\mathbf{y} - \mathbf{X}\boldsymbol{\beta}^{(t)})^T \boldsymbol{\Omega}^{-(t)} \mathbf{V}_i \boldsymbol{\Omega}^{-(t)} (\mathbf{y} - \mathbf{X}\boldsymbol{\beta}^{(t)}) & i = j \\ 0 & i \neq j. \end{cases}
\end{aligned}$$

**EM algorithm:** Assume  $\mathbf{Y} = \mathbf{X}\boldsymbol{\beta} + \sum_{i=1}^m \mathbf{Z}_i$ , where  $\mathbf{Z}_i \sim N(\mathbf{0}, \sigma_i^2 \mathbf{V}_i)$  are independent. Then the complete data is  $\mathbf{Z} = (\mathbf{Z}_1, \dots, \mathbf{Z}_m)$ . From the information inequality, we have

$$L(\mathbf{y} | \boldsymbol{\sigma}^2) \geq Q(\boldsymbol{\sigma}^2 | \boldsymbol{\sigma}^{2(t)}) - Q(\boldsymbol{\sigma}^{2(t)} | \boldsymbol{\sigma}^{2(t)}) + L(\mathbf{y} | \boldsymbol{\sigma}^{2(t)}),$$

where

$$\begin{aligned}
L(\mathbf{y} | \boldsymbol{\sigma}^2) &= -\frac{n}{2} \ln(2\pi) - \frac{1}{2} \ln \det \boldsymbol{\Omega} - \frac{1}{2} (\mathbf{y} - \mathbf{X}\boldsymbol{\beta})^T \boldsymbol{\Omega}^{-1} (\mathbf{y} - \mathbf{X}\boldsymbol{\beta}), \\
Q(\boldsymbol{\sigma}^2 | \boldsymbol{\sigma}^{2(t)}) &= -\frac{1}{2} \sum_{i=1}^m \left[ \text{rank}(\mathbf{V}_i) \ln \sigma_i^2 + \frac{\sigma_i^{2(t)}}{\sigma_i^2} \text{rank}(\mathbf{V}_i) - \frac{\sigma_i^{4(t)}}{\sigma_i^2} \text{tr}(\boldsymbol{\Omega}^{-(t)} \mathbf{V}_i) \right] \\
&\quad - \frac{1}{2} \sum_{i=1}^m \left[ \frac{\sigma_i^{4(t)}}{\sigma_i^2} (\mathbf{y} - \mathbf{X}\boldsymbol{\beta}^{(t)})^T \boldsymbol{\Omega}^{-(t)} \mathbf{V}_i \boldsymbol{\Omega}^{-(t)} (\mathbf{y} - \mathbf{X}\boldsymbol{\beta}^{(t)}) \right].
\end{aligned}$$

We derive this expression in Section S.6. The minorizing function

$$\begin{aligned}
& g_{\text{EM}}(\boldsymbol{\sigma} | \boldsymbol{\sigma}^{2(t)}) \\
&= Q(\boldsymbol{\sigma}^2 | \boldsymbol{\sigma}^{2(t)}) - Q(\boldsymbol{\sigma}^{2(t)} | \boldsymbol{\sigma}^{2(t)}) + L(\mathbf{y} | \boldsymbol{\sigma}^{2(t)}) \\
&= -\frac{1}{2} \sum_{i=1}^m \left[ \text{rank}(\mathbf{V}_i) \ln \sigma_i^2 + \frac{\sigma_i^{2(t)}}{\sigma_i^2} \text{rank}(\mathbf{V}_i) - \frac{\sigma_i^{4(t)}}{\sigma_i^2} \text{tr}(\boldsymbol{\Omega}^{-(t)} \mathbf{V}_i) \right] \\
&\quad - \frac{1}{2} \sum_{i=1}^m \left[ \frac{\sigma_i^{4(t)}}{\sigma_i^2} (\mathbf{y} - \mathbf{X}\boldsymbol{\beta}^{(t)})^T \boldsymbol{\Omega}^{-(t)} \mathbf{V}_i \boldsymbol{\Omega}^{-(t)} (\mathbf{y} - \mathbf{X}\boldsymbol{\beta}^{(t)}) \right] \\
&\quad - \frac{1}{2} \sum_{i=1}^m \left[ -\text{rank}(\mathbf{V}_i) \ln \sigma_i^{2(t)} - \text{rank}(\mathbf{V}_i) \right] - \frac{1}{2} \left[ n \ln(2\pi) + \ln \det \boldsymbol{\Omega}^{(t)} + n \right]
\end{aligned}$$

of the EM algorithms depends on  $\sigma^2$  only through  $Q(\sigma^2|\sigma^{2(t)})$ . Taking derivatives, we have

$$\begin{aligned}
& \frac{\partial}{\partial \sigma_i^2} g_{\text{EM}}(\sigma^2|\sigma^{2(t)}) \\
&= -\frac{\text{rank}(\mathbf{V}_i)}{2\sigma_i^2} + \frac{\text{rank}(\mathbf{V}_i)\sigma_i^{2(t)} - \sigma_i^{4(t)}\text{tr}(\Omega^{-(t)}\mathbf{V}_i) + \sigma_i^{4(t)}(\mathbf{y} - \mathbf{X}\beta^{(t)})^T \Omega^{-(t)} \mathbf{V}_i \Omega^{-(t)} (\mathbf{y} - \mathbf{X}\beta^{(t)})}{2\sigma_i^4}, \\
& \frac{\partial^2}{\partial \sigma_i^2 \partial \sigma_j^2} g_{\text{EM}}(\sigma^2|\sigma^{2(t)}) \\
&= \begin{cases} \frac{\text{rank}(\mathbf{V}_i)}{2\sigma_i^4} - \frac{\text{rank}(\mathbf{V}_i)\sigma_i^{2(t)} - \sigma_i^{4(t)}\text{tr}(\Omega^{-(t)}\mathbf{V}_i) + \sigma_i^{4(t)}(\mathbf{y} - \mathbf{X}\beta^{(t)})^T \Omega^{-(t)} \mathbf{V}_i \Omega^{-(t)} (\mathbf{y} - \mathbf{X}\beta^{(t)})}{\sigma_i^6} & i = j \\ 0 & i \neq j. \end{cases}
\end{aligned}$$

**EM vs MM:** Let  $\sigma^{2(\infty)}$  be a common limit point of EM and MM. By Lemma S.2, each component of  $\sigma^{2(\infty)}$  is either 0 or has vanishing gradient. Therefore

$$\begin{aligned}
\frac{\partial^2}{(\partial \sigma_i^2)^2} g_{\text{EM}}(\sigma^2|\sigma^{2(\infty)}) \big|_{\sigma^2=\sigma^{2(\infty)}} &= -\frac{\text{rank}(\mathbf{V}_i)}{2\sigma_i^{4(\infty)}}, \\
\frac{\partial^2}{(\partial \sigma_i^2)^2} g_{\text{MM}}(\sigma^2|\sigma^{2(\infty)}) \big|_{\sigma^2=\sigma^{2(\infty)}} &= -\frac{\text{tr}(\Omega^{-(\infty)}\mathbf{V}_i)}{\sigma_i^{2(\infty)}}
\end{aligned}$$

and, when all the  $\mathbf{V}_i$  all non-singular,

$$\begin{aligned}
& \frac{1}{m} \sum_{i=1}^m \frac{[d^2 g_{\text{MM}}(\sigma^{2(\infty)}|\sigma^{2(\infty)})]_{ii}}{[d^2 g_{\text{EM}}(\sigma^{2(\infty)}|\sigma^{2(\infty)})]_{ii}} \\
&= \frac{2}{m} \sum_{i=1}^m \frac{\sigma_i^{2(\infty)} \text{tr}(\Omega^{-(\infty)}\mathbf{V}_i)}{\text{rank}(\mathbf{V}_i)} \\
&= \frac{2}{m} \leq 1.
\end{aligned}$$

## S.5 Derivation of Algorithm 4

When there are  $m = 2$  variance components  $\Omega = \Gamma_1 \otimes \mathbf{V}_1 + \Gamma_2 \otimes \mathbf{V}_2$ , repeated inversion of the  $nd \times nd$  covariance matrix  $\Omega$  can be reduced to one  $d \times d$  (generalized) eigen-decomposition per iteration. The generalized eigen-decomposition of the matrix pair  $(\mathbf{V}_1, \mathbf{V}_2)$  yields generalized eigenvalues  $\mathbf{d} = (d_1, \dots, d_n)^T$  and generalized eigenvectors  $\mathbf{U}$  such that  $\mathbf{U}^T \mathbf{V}_1 \mathbf{U} = \mathbf{D} = \text{diag}(\mathbf{d})$  and  $\mathbf{U}^T \mathbf{V}_2 \mathbf{U} = \mathbf{I}$ . Let the generalized eigen-decomposition of  $(\Gamma_1^{(t)}, \Gamma_2^{(t)})$  be  $(\Lambda^{(t)}, \Phi^{(t)})$  such that  $\Phi^{(t)T} \Gamma_1^{(t)} \Phi^{(t)} = \Lambda^{(t)} = \text{diag}(\lambda^{(t)})$  and  $\Phi^{(t)T} \Gamma_2 \Phi^{(t)} = \mathbf{I}_d$ . It follows that

$$\begin{aligned}
\Omega^{(t)} &= (\Phi^{-(t)} \otimes \mathbf{U}^{-1})^T (\Lambda^{(t)} \otimes \mathbf{D} + \mathbf{I}_d \otimes \mathbf{I}_n) (\Phi^{-(t)} \otimes \mathbf{U}^{-1}) \\
\Omega^{-(t)} &= (\Phi^{(t)} \otimes \mathbf{U}) (\Lambda^{(t)} \otimes \mathbf{D} + \mathbf{I}_d \otimes \mathbf{I}_n)^{-1} (\Phi^{(t)} \otimes \mathbf{U})^T \\
\det \Omega^{(t)} &= \det(\Lambda^{(t)} \otimes \mathbf{D} + \mathbf{I}_d \otimes \mathbf{I}_n) \det(\Phi^{-(t)} \otimes \mathbf{U}^{-1})^T (\Phi^{-(t)} \otimes \mathbf{U}^{-1}) \\
&= \det(\Lambda^{(t)} \otimes \mathbf{D} + \mathbf{I}_d \otimes \mathbf{I}_n) \det(\Gamma_2^{(t)} \otimes \mathbf{V}_2) \\
&= \det(\Lambda^{(t)} \otimes \mathbf{D} + \mathbf{I}_d \otimes \mathbf{I}_n) \det(\Gamma_2^{(t)})^n \det(\mathbf{V}_2)^d.
\end{aligned}$$

To update the fixed effects  $\mathbf{B}$  given  $\mathbf{\Gamma}_1^{(t)}$  and  $\mathbf{\Gamma}_2^{(t)}$ , the general least squares criterion is

$$\begin{aligned}
& \frac{1}{2} [\text{vec}(\mathbf{Y} - \mathbf{XB})]^T \mathbf{\Omega}^{-(t)} [\text{vec}(\mathbf{Y} - \mathbf{XB})] \\
&= \frac{1}{2} [\text{vec}(\mathbf{Y} - \mathbf{XB})]^T (\mathbf{\Phi}^{(t)} \otimes \mathbf{U}) (\mathbf{\Lambda}^{(t)} \otimes \mathbf{D} + \mathbf{I}_d \otimes \mathbf{I}_n)^{-1} (\mathbf{\Phi}^{(t)} \otimes \mathbf{U})^T [\text{vec}(\mathbf{Y} - \mathbf{XB})] \\
&= \frac{1}{2} \text{vec}[\mathbf{U}^T (\mathbf{Y} - \mathbf{XB}) \mathbf{\Phi}^{(t)}]^T (\mathbf{\Lambda}^{(t)} \otimes \mathbf{D} + \mathbf{I}_d \otimes \mathbf{I}_n)^{-1} \text{vec}[\mathbf{U}^T (\mathbf{Y} - \mathbf{XB}) \mathbf{\Phi}^{(t)}] \\
&= \frac{1}{2} [\text{vec}(\mathbf{U}^T \mathbf{Y} \mathbf{\Phi}^{(t)}) - (\mathbf{\Phi}^{(t)T} \otimes \mathbf{U}^T \mathbf{X}) \text{vec} \mathbf{B}]^T (\mathbf{\Lambda}^{(t)} \otimes \mathbf{D} + \mathbf{I}_d \otimes \mathbf{I}_n)^{-1} \\
&\quad \cdot [\text{vec}(\mathbf{U}^T \mathbf{Y} \mathbf{\Phi}^{(t)}) - (\mathbf{\Phi}^{(t)T} \otimes \mathbf{U}^T \mathbf{X}) \text{vec} \mathbf{B}].
\end{aligned}$$

Minimization of this criterion reduces to a weighted least squares problem for the transformed responses  $\tilde{\mathbf{Y}} = \mathbf{U}^T \mathbf{Y}$ , transformed predictor matrix  $\tilde{\mathbf{X}} = \mathbf{U}^T \mathbf{X}$ , and observation weights  $(\lambda_k^{(t)} d_i + 1)^{-1}$ . To update  $\mathbf{\Gamma}_1^{(t)}$  and  $\mathbf{\Gamma}_2^{(t)}$ , we need to evaluate the matrices  $\mathbf{M}_i$  and  $\mathbf{\Gamma}_i^{(t)} \mathbf{R}^{(t)T} \mathbf{V}_i \mathbf{R}^{(t)} \mathbf{\Gamma}_i^{(t)}$  that appear in the stationarity condition (13).

**Evaluation of  $\mathbf{M}_i$ :** Note the  $(j, k)$ -th entry of  $\mathbf{M}_i$  is  $\text{tr}(\mathbf{\Omega}_{jk}^{-(t)} \mathbf{V}_i)$ , where  $\mathbf{\Omega}_{jk}^{-(t)}$  is the  $(j, k)$ -th block of

$$\mathbf{\Omega}^{-(t)} = (\mathbf{\Phi}^{(t)} \otimes \mathbf{U}) (\mathbf{\Lambda}^{(t)} \otimes \mathbf{D} + \mathbf{I}_d \otimes \mathbf{I}_n)^{-1} (\mathbf{\Phi}^{(t)} \otimes \mathbf{U})^T,$$

which can be expressed as

$$\mathbf{\Omega}_{jk}^{-(t)} = \sum_{l=1}^d \phi_{jl}^{(t)} \phi_{lk}^{(t)} \mathbf{U} (\lambda_l^{(t)} \mathbf{D} + \mathbf{I}_n)^{-1} \mathbf{U}^T.$$

Therefore  $\mathbf{M}_1$  has entries

$$\begin{aligned}
(\mathbf{M}_1)_{jk} &= \text{tr}(\mathbf{V}_1 \mathbf{\Omega}_{ij}^{-(t)}) \\
&= \text{tr} \left[ \mathbf{U}^{-T} \mathbf{D} \mathbf{U}^{-1} \sum_{l=1}^d \phi_{jl}^{(t)} \phi_{lk}^{(t)} \mathbf{U} (\lambda_l^{(t)} \mathbf{D} + \mathbf{I}_n)^{-1} \mathbf{U}^T \right] \\
&= \text{tr} \left[ \sum_{l=1}^d \phi_{jl}^{(t)} \phi_{lk}^{(t)} \mathbf{D} (\lambda_l^{(t)} \mathbf{D} + \mathbf{I}_n)^{-1} \right] \\
&= \sum_{l=1}^d \phi_{jl}^{(t)} \phi_{lk}^{(t)} \text{tr} \left[ \mathbf{D} (\lambda_l^{(t)} \mathbf{D} + \mathbf{I}_n)^{-1} \right],
\end{aligned}$$

and  $\mathbf{M}_2$  has entries

$$\begin{aligned}
(\mathbf{M}_2)_{jk} &= \text{tr}(\mathbf{V}_2 \mathbf{\Omega}_{ij}^{-(t)}) \\
&= \text{tr} \left[ \mathbf{U}^{-T} \mathbf{U}^{-1} \sum_{l=1}^d \phi_{jl}^{(t)} \phi_{lk}^{(t)} \mathbf{U} (\lambda_l^{(t)} \mathbf{D} + \mathbf{I}_n)^{-1} \mathbf{U}^T \right] \\
&= \text{tr} \left[ \sum_{l=1}^d \phi_{jl}^{(t)} \phi_{lk}^{(t)} (\lambda_l^{(t)} \mathbf{D} + \mathbf{I}_n)^{-1} \right] \\
&= \sum_{l=1}^d \phi_{jl}^{(t)} \phi_{lk}^{(t)} \text{tr}(\lambda_l^{(t)} \mathbf{D} + \mathbf{I}_n)^{-1}.
\end{aligned}$$

Collectively we have

$$\begin{aligned} \mathbf{M}_1 &= \mathbf{\Phi}^{(t)} \text{diag} \left\{ \text{tr} \left[ \mathbf{D}(\lambda_l^{(t)} \mathbf{D} + \mathbf{I}_n)^{-1} \right] \right\} \mathbf{\Phi}^{(t)T} \\ \mathbf{M}_2 &= \mathbf{\Phi}^{(t)} \text{diag} \left[ \text{tr}(\lambda_l^{(t)} \mathbf{D} + \mathbf{I}_n)^{-1} \right] \mathbf{\Phi}^{(t)T}. \end{aligned}$$

**Evaluation of  $\mathbf{\Gamma}_i^{(t)} \mathbf{R}^{(t)T} \mathbf{V}_i \mathbf{R}^{(t)} \mathbf{\Gamma}_i^{(t)}$ :** Write

$$\begin{aligned} \mathbf{\Gamma}_1^{(t)} \mathbf{R}^{(t)T} \mathbf{V}_1 \mathbf{R}^{(t)} \mathbf{\Gamma}_1^{(t)} &= \mathbf{N}_1^T \mathbf{N}_1 \\ \mathbf{\Gamma}_2^{(t)} \mathbf{R}^{(t)T} \mathbf{V}_2 \mathbf{R}^{(t)} \mathbf{\Gamma}_2^{(t)} &= \mathbf{N}_2^T \mathbf{N}_2, \end{aligned}$$

where

$$\begin{aligned} \mathbf{N}_1 &= \mathbf{D}^{1/2} \mathbf{U}^{-1} \mathbf{R}^{(t)} \mathbf{\Phi}^{-(t)T} \mathbf{\Lambda}^{(t)} \mathbf{\Phi}^{-(t)} \\ \mathbf{N}_2 &= \mathbf{U}^{-1} \mathbf{R}^{(t)} \mathbf{\Phi}^{-(t)T} \mathbf{\Phi}^{-(t)}. \end{aligned}$$

To further simplify, note

$$\begin{aligned} &\text{vec } \mathbf{N}_1 \\ &= (\mathbf{\Phi}^{-(t)T} \mathbf{\Lambda}^{(t)} \mathbf{\Phi}^{-(t)} \otimes \mathbf{D}^{1/2} \mathbf{U}^{-1}) \text{vec } \mathbf{R}^{(t)} \\ &= (\mathbf{\Phi}^{-(t)T} \mathbf{\Lambda}^{(t)} \mathbf{\Phi}^{-(t)} \otimes \mathbf{D}^{1/2} \mathbf{U}^{-1}) \mathbf{\Omega}^{-(t)} \text{vec}(\mathbf{Y} - \mathbf{X} \mathbf{B}^{(t)}) \\ &= (\mathbf{\Phi}^{-(t)T} \mathbf{\Lambda}^{(t)} \mathbf{\Phi}^{-(t)} \otimes \mathbf{D}^{1/2} \mathbf{U}^{-1}) (\mathbf{\Phi}^{(t)} \otimes \mathbf{U}) (\mathbf{\Lambda}^{(t)} \otimes \mathbf{D} + \mathbf{I}_d \otimes \mathbf{I}_n)^{-1} (\mathbf{\Phi}^{(t)} \otimes \mathbf{U})^T \text{vec}(\mathbf{Y} - \mathbf{X} \mathbf{B}^{(t)}) \\ &= (\mathbf{\Phi}^{-(t)T} \mathbf{\Lambda}^{(t)} \otimes \mathbf{D}^{1/2}) (\mathbf{\Lambda}^{(t)} \otimes \mathbf{D} + \mathbf{I}_d \otimes \mathbf{I}_n)^{-1} \text{vec}(\mathbf{U}^T (\mathbf{Y} - \mathbf{X} \mathbf{B}^{(t)}) \mathbf{\Phi}^{(t)}) \\ &= (\mathbf{\Phi}^{-(t)T} \mathbf{\Lambda}^{(t)} \otimes \mathbf{D}^{1/2}) \text{vec}[\mathbf{U}^T (\mathbf{Y} - \mathbf{X} \mathbf{B}^{(t)}) \mathbf{\Phi}^{(t)} \oslash (\mathbf{d} \boldsymbol{\lambda}^{(t)T} + \mathbf{1}_n \mathbf{1}_d^T)] \\ &= \text{vec} \{ \mathbf{D}^{1/2} [(\mathbf{U}^T (\mathbf{Y} - \mathbf{X} \mathbf{B}^{(t)}) \mathbf{\Phi}^{(t)}) \oslash (\mathbf{d} \boldsymbol{\lambda}^{(t)T} + \mathbf{1}_n \mathbf{1}_d^T)] \mathbf{\Lambda}^{(t)} \mathbf{\Phi}^{-(t)} \}, \end{aligned}$$

where  $\oslash$  denotes a Hadamard quotient. Thus,

$$\mathbf{N}_1 = \mathbf{D}^{1/2} \{[(\tilde{\mathbf{Y}} - \tilde{\mathbf{X}} \mathbf{B}^{(t)}) \mathbf{\Phi}^{(t)}] \oslash (\mathbf{d} \boldsymbol{\lambda}^{(t)T} + \mathbf{1}_n \mathbf{1}_d^T)\} \mathbf{\Lambda}^{(t)} \mathbf{\Phi}^{-(t)},$$

and similarly

$$\mathbf{N}_2 = \{[(\tilde{\mathbf{Y}} - \tilde{\mathbf{X}} \mathbf{B}^{(t)}) \mathbf{\Phi}^{(t)}] \oslash (\mathbf{d} \boldsymbol{\lambda}^{(t)T} + \mathbf{1}_n \mathbf{1}_d^T)\} \mathbf{\Phi}^{-(t)}.$$

## S.6 EM Algorithm for the Multivariate Response Model

In this section we review the derivation of the EM algorithm for the multivariate response model (Glanz and Carvalho, 2013; Reinsel, 1984). If the response matrix  $\mathbf{Y}$  can be written as the sum  $\mathbf{Y} = \mathbf{X} \mathbf{B} + \mathbf{Z}_1 + \dots + \mathbf{Z}_m$  of independent random matrices with  $\text{vec } \mathbf{Z}_i \sim N(\mathbf{0}, \mathbf{\Omega}_i)$ , then  $\text{vec } \mathbf{Y} \sim N(\text{vec}(\mathbf{X} \boldsymbol{\beta}), \mathbf{\Omega})$ , where  $\mathbf{\Omega} = \sum_{i=1}^m \mathbf{\Omega}_i$ . Under the matrix normal assumption,  $\mathbf{\Omega}_i = \mathbf{\Gamma}_i \otimes \mathbf{V}_i$ . As in the text, the  $p \times d$  coefficient matrix  $\mathbf{B}$  collects the fixed effects, the  $\mathbf{\Gamma}_i$  are unknown  $d \times d$  covariance matrices, and the  $\mathbf{V}_i$  are known  $n \times n$  covariance matrices. The complete data log-likelihood for the unobserved  $\mathbf{Z}_i$  is

$$-\frac{1}{2} \sum_{i=1}^m \ln \det^+ \mathbf{\Omega}_i - \frac{1}{2} \sum_{i=1}^m \text{vec}(\mathbf{Z}_i)^T \mathbf{\Omega}_i^+ \text{vec}(\mathbf{Z}_i),$$



where  $\det^+ \boldsymbol{\Omega}_i$  denotes the pseudo-determinant of  $\boldsymbol{\Omega}_i$  and  $\boldsymbol{\Omega}_i^+$  the pseudo-inverse of  $\boldsymbol{\Omega}_i$ . To compute the surrogate function for the EM algorithm, one needs the conditional expectations

$$\mathbb{E}(\text{vec } \mathbf{Z}_i \mid \mathbf{Y}, \boldsymbol{\theta}^{(t)}) = \boldsymbol{\Omega}_i^{(t)} \boldsymbol{\Omega}^{-(t)} \text{vec}(\mathbf{Y} - \mathbf{X} \mathbf{B}^{(t)}) = \mathbf{E}_i^{(t)}$$

and the conditional covariances

$$\text{Cov}(\text{vec } \mathbf{Z}_i \mid \mathbf{Y}, \boldsymbol{\theta}^{(t)}) = \boldsymbol{\Omega}_i^{(t)} - \boldsymbol{\Omega}_i^{(t)} \boldsymbol{\Omega}^{-(t)} \boldsymbol{\Omega}_i^{(t)} = \mathbf{F}_i^{(t)},$$

where  $\boldsymbol{\theta}$  is the parameter vector. These are employed to compute the conditional second moments

$$\mathbb{E}(\text{vec } \mathbf{Z}_i \text{ vec } \mathbf{Z}_i^T \mid \mathbf{Y}, \boldsymbol{\theta}^{(t)}) = \mathbf{F}_i^{(t)} + \mathbf{E}_i^{(t)} (\mathbf{E}_i^{(t)})^T = \mathbf{G}_i^{(t)}.$$

Here the random vector  $\mathbf{Z}_i$  should be replaced by  $\mathbf{Z}_m - \mathbf{X} \mathbf{B}^{(t)}$  when  $i = m$ .

One can readily check that  $\boldsymbol{\Omega}_i^+ = \boldsymbol{\Gamma}_i^+ \otimes \mathbf{V}_i^+ = \boldsymbol{\Gamma}_i^{-1} \otimes \mathbf{V}_i^+$  for  $\boldsymbol{\Gamma}_i$  invertible. Since the pseudo-determinant of a positive semidefinite matrix equals the product of its positive eigenvalues, the formulas

$$\begin{aligned} \det^+ \boldsymbol{\Omega}_i &= (\det \boldsymbol{\Gamma}_i)^{r_i} (\det^+ \mathbf{V}_i)^{s_i} \\ \ln \det^+ \boldsymbol{\Omega}_i &= r_i \ln \det \boldsymbol{\Gamma}_i + s_i \ln \det^+ \mathbf{V}_i \end{aligned}$$

apply, where  $r_i = \text{rank}(\mathbf{V}_i^+)$  and  $s_i = \text{rank}(\boldsymbol{\Gamma}_i^+)$ . In the M step of the EM algorithm, one maximizes the surrogate

$$-\frac{1}{2} \sum_{i=1}^m r_i \ln \det \boldsymbol{\Gamma}_i - \frac{1}{2} \sum_{i=1}^m \text{tr}[(\boldsymbol{\Gamma}_i^{-1} \otimes \mathbf{V}_i^+) \mathbf{G}_i^{(t)}]. \quad (3)$$

For  $\boldsymbol{\Gamma}_i$  unstructured, we substitute  $\boldsymbol{\Lambda}_i = \boldsymbol{\Gamma}_i^{-1}$  and maximize with respect to  $\boldsymbol{\Lambda}_i$ . Fortunately, the next lemma can be invoked.

**Lemma S.4.** *If the matrices  $\mathbf{A}$ ,  $\mathbf{B}$ , and  $\mathbf{C}$  are  $d \times d$ ,  $n \times n$ , and  $dn \times dn$  respectively, then*

$$\text{tr}[(\mathbf{A} \otimes \mathbf{B}) \mathbf{C}^T] = \text{tr}\{(\mathbf{I}_d \otimes \mathbf{1}_n)^T [(\mathbf{1}_d \mathbf{1}_d^T \otimes \mathbf{B}) \odot \mathbf{C}] (\mathbf{I}_d \otimes \mathbf{1}_n) \mathbf{A}^T\}.$$

*Proof.* This trace identity is essentially proved in the text. □

Lemma S.4 yields

$$\text{tr}[(\boldsymbol{\Lambda}_i \otimes \mathbf{V}_i^+) \mathbf{G}_i^{(t)}] = \text{tr}\{(\mathbf{I}_d \otimes \mathbf{1}_n)^T [(\mathbf{1}_d \mathbf{1}_d^T \otimes \mathbf{V}_i^+) \odot \mathbf{G}_i^{(t)}] (\mathbf{I}_d \otimes \mathbf{1}_n) \boldsymbol{\Lambda}_i\}.$$

The stationarity condition

$$\mathbf{0} = \frac{1}{2} r_i \boldsymbol{\Lambda}_i^{-1} - \frac{1}{2} (\mathbf{I}_d \otimes \mathbf{1}_n)^T [(\mathbf{1}_d \mathbf{1}_d^T \otimes \mathbf{V}_i^+) \odot \mathbf{G}_i^{(t)}] (\mathbf{I}_d \otimes \mathbf{1}_n).$$

now entails the update

$$\boldsymbol{\Gamma}_i^{(t+1)} = \frac{1}{r_i} (\mathbf{I}_d \otimes \mathbf{1}_n)^T [(\mathbf{1}_d \mathbf{1}_d^T \otimes \mathbf{V}_i^+) \odot \mathbf{G}_i^{(t)}] (\mathbf{I}_d \otimes \mathbf{1}_n).$$

In the case  $m = 1$ , the single update reduces to

$$\mathbf{\Gamma}^{(t+1)} = \frac{1}{r}(\mathbf{Y} - \mathbf{X}\mathbf{B}^{(t)})^T \mathbf{V}^+ (\mathbf{Y} - \mathbf{X}\mathbf{B}^{(t)}),$$

which matches the earlier result of Glanz and Carvalho (2013). When  $\mathbf{\Gamma}_i$  is the scalar  $\sigma_i^2$ ,

$$\begin{aligned} \mathbf{E}_i^{(t)} &= \sigma_i^{2(t)} \mathbf{V}_i \mathbf{\Omega}^{-(t)} (\mathbf{y} - \mathbf{X}\mathbf{\beta}^{(t)}) \\ \mathbf{F}_i^{(t)} &= \sigma_i^{2(t)} \mathbf{V}_i - \sigma_i^{2(t)} \mathbf{V}_i \mathbf{\Omega}^{-(t)} \sigma_i^{2(t)} \mathbf{V}_i. \end{aligned}$$

One recovers the representation (3) by substituting these quantities in equation (3) and invoking the identities  $\mathbf{V}_i \mathbf{V}_i^+ \mathbf{V}_i = \mathbf{V}_i$  and  $\text{tr}(\mathbf{V}_i \mathbf{V}_i^+) = \text{rank}(\mathbf{V}_i)$  and the cyclic permutation property of the trace.

## S.7 Proof of Lemma 3

*Proof.* Direct substitution shows that  $\mathbf{Y}$  solves the equivalent equation  $\mathbf{X}\mathbf{B}\mathbf{X} = \mathbf{A}$ . To show uniqueness, suppose  $\mathbf{Y}^{-1}\mathbf{A}\mathbf{Y}^{-1} = \mathbf{B}$  and  $\mathbf{Z}^{-1}\mathbf{A}\mathbf{Z}^{-1} = \mathbf{B}$ . The equations

$$\begin{aligned} (\mathbf{B}^{1/2}\mathbf{Y}\mathbf{B}^{1/2})^2 &= \mathbf{B}^{1/2}\mathbf{Y}\mathbf{B}\mathbf{Y}\mathbf{B}^{1/2} = \mathbf{B}^{1/2}\mathbf{A}\mathbf{B}^{1/2} \\ (\mathbf{B}^{1/2}\mathbf{Z}\mathbf{B}^{1/2})^2 &= \mathbf{B}^{1/2}\mathbf{Z}\mathbf{B}\mathbf{Z}\mathbf{B}^{1/2} = \mathbf{B}^{1/2}\mathbf{A}\mathbf{B}^{1/2} \end{aligned}$$

imply  $\mathbf{B}^{1/2}\mathbf{Y}\mathbf{B}^{1/2} = \mathbf{B}^{1/2}\mathbf{Z}\mathbf{B}^{1/2}$  by virtue of the uniqueness of symmetric square root. Since  $\mathbf{B}^{-1/2}$  is positive definite,  $\mathbf{Y} = \mathbf{Z}$ .  $\square$

## S.8 Proof of Proposition 2

*Proof.* If  $\mathbf{V}_i$  has strictly positive diagonal entries, then so does  $\mathbf{1}_d \mathbf{1}_d^T \otimes \mathbf{V}_i$ , and the Hadamard product  $(\mathbf{1}_d \mathbf{1}_d^T \otimes \mathbf{V}_i) \odot \mathbf{\Omega}^{-(t)}$  is positive definite by Schur's lemma. Since the matrix  $\mathbf{I}_d \otimes \mathbf{1}_n$  has full column rank  $d$ , the matrix  $\mathbf{M}_i$  is also positive definite. Finally, if no column of  $\mathbf{R}^{(t)}$  lies in the null space of  $\mathbf{V}_i$ , and  $\mathbf{\Gamma}^{(t)}$  is positive definite, then  $\mathbf{\Gamma}_i^{(t)} \mathbf{R}^{(t)T} \mathbf{V}_i \mathbf{R}^{(t)} \mathbf{\Gamma}_i^{(t)}$  is positive definite. The second claim follows by induction and Lemma 3.  $\square$

## S.9 Proof of Lemma 4

*Proof.* Under the hypotheses, the representations  $\mathbf{A}^+ = (\mathbf{A}^T \mathbf{A})^+ \mathbf{A}^T = (\mathbf{A}^T \mathbf{A})^{-1} \mathbf{A}^T$  and  $\mathbf{B}^+ = \mathbf{B}^T (\mathbf{B} \mathbf{B}^T)^{-1}$  are well known. The choice  $\mathbf{B}^+ \mathbf{A}^+ = \mathbf{B}^T (\mathbf{B} \mathbf{B}^T)^{-1} (\mathbf{A}^T \mathbf{A})^{-1} \mathbf{A}^T$  satisfies the four equations characterizing the pseudo-inverse of  $\mathbf{A}\mathbf{B}$ .  $\square$

## S.10 Proof of Lemma 5

*Proof.* Suppose  $\mathbf{A}$  has spectral decomposition  $\sum_i \lambda_i \mathbf{u}_i \mathbf{u}_i^T$ . The matrix  $\mathbf{P} = \sum_{\lambda_i > 0} \mathbf{u}_i \mathbf{u}_i^T$  projects onto the range of  $\mathbf{A}$  and therefore also projects onto the range of  $\mathbf{B}$ . It follows that  $\mathbf{P}\mathbf{B} = \mathbf{B}$  and by symmetry that  $\mathbf{B}\mathbf{P} = \mathbf{B}$ . This allows us to write

$$\begin{aligned} &(\mathbf{B} + \epsilon \mathbf{I})(\mathbf{A} + \epsilon \mathbf{I})^{-1}(\mathbf{B} + \epsilon \mathbf{I}) \\ &= \mathbf{B}\mathbf{P}(\mathbf{A} + \epsilon \mathbf{I})^{-1}\mathbf{P}\mathbf{B} + \epsilon \mathbf{B}\mathbf{P}(\mathbf{A} + \epsilon \mathbf{I})^{-1} + \epsilon(\mathbf{A} + \epsilon \mathbf{I})^{-1}\mathbf{P}\mathbf{B} + \epsilon^2(\mathbf{A} + \epsilon \mathbf{I})^{-1}. \end{aligned}$$

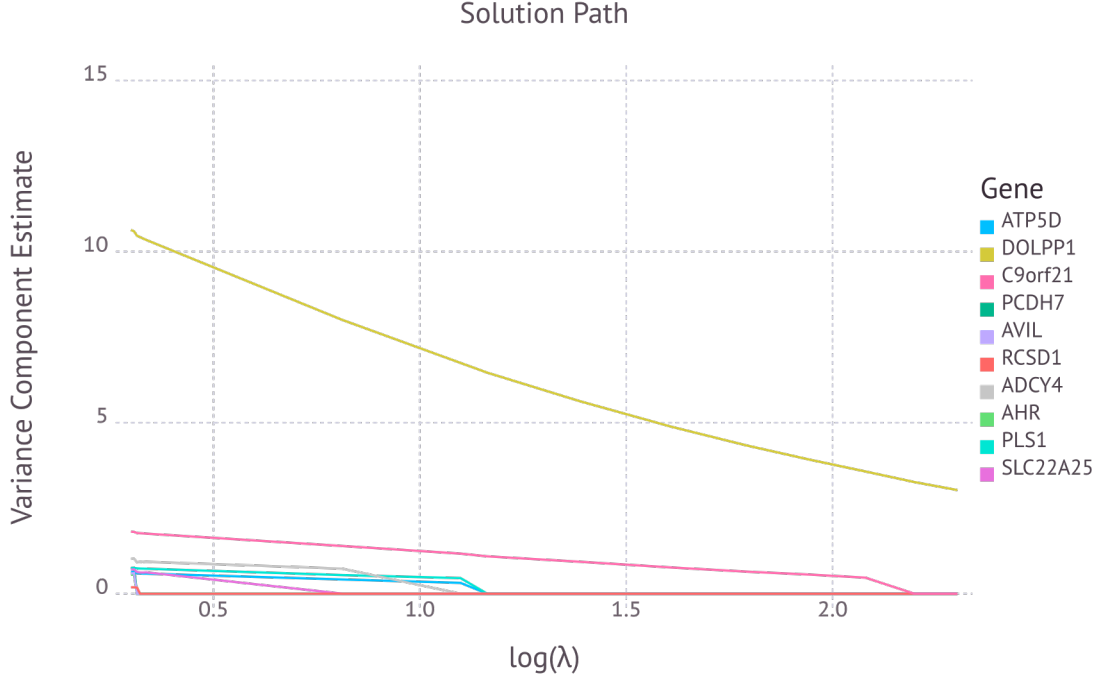

Figure 1: Solution path of the lasso penalized variance component model (17) indicates the top genes in an association study of 200 genes and the complex trait **height**.

The last three of these terms vanish as  $\epsilon \downarrow 0$ ; the first term tends to the claimed limit. These assertions follow from the expressions

$$P(A + \epsilon I)^{-1}P = P(A + \epsilon I)^{-1} = (A + \epsilon I)^{-1}P = \sum_{\lambda_i > 0} \frac{1}{\lambda_i + \epsilon} \mathbf{u}_i \mathbf{u}_i^T$$

and  $\epsilon^2(A + \epsilon I)^{-1} = \sum_i \frac{\epsilon^2}{\lambda_i + \epsilon} \mathbf{u}_i \mathbf{u}_i^T$ . □

### S.11 Proof of Lemma 6

*Proof.* In fact, both matrices have range equal to the range of  $\mathbf{Z}$ . The matrices  $\mathbf{Z}$  and  $\mathbf{Z}\mathbf{R}^{1/2}$  clearly have the same range. Furthermore, the matrices  $\mathbf{Z}\mathbf{R}^{1/2}$  and  $\mathbf{Z}\mathbf{R}^{1/2}\mathbf{R}^{1/2}\mathbf{Z}^T$  also have the same range. □

### S.12 Lasso solution path

Figure 1 displays the lasso solution path for the QTL example in Section 7.

## References

Glanz, H. and Carvalho, L. (2013). An expectation-maximization algorithm for the matrix normal distribution. *arXiv*, 1309.6609.

- Lange, K. (2010). *Numerical Analysis for Statisticians*. Statistics and Computing. Springer, New York, second edition.
- Reinsel, G. (1984). Estimation and prediction in a multivariate random effects generalized linear model. *J. Amer. Statist. Assoc.*, 79(386):406–414.
